# Supplementary material for: A bimetallic Co/Mn metal–organic-framework with a synergistic catalytic effect as peroxidase for the colorimetric detection of H2O2
Source: Royal Society of Chemistry journal article supplement (doi:10.1039/c8ay02514b), 2019-01-01
Supplement: c8ay02514b1.pdf [file c8ay02514b1.pdf]

### Electronic supporting information

**Table S1.** BET specific surface area of Co/Mn-MOFs-150 with different ratio of  $\text{CoCl}_2 \cdot 6\text{H}_2\text{O}$  and  $\text{MnCl}_2 \cdot 4\text{H}_2\text{O}$

| MOFs                                   | Co/Mn-<br>MOFs-1-0-<br>150 | Co/Mn-<br>MOFs-3-1-<br>150 | Co/Mn-<br>MOFs-1-1-<br>150 | Co/Mn-<br>MOFs-1-3-<br>150 | Co/Mn-<br>MOFs-0-1-<br>150 |
|----------------------------------------|----------------------------|----------------------------|----------------------------|----------------------------|----------------------------|
| $S_{\text{BET}}/(\text{m}^2/\text{g})$ | 426.1                      | 444.1                      | 488.1                      | 432.3                      | 406.4                      |
